# Supplementary material for: Comparative Life Cycle Assessment and Cost Analysis of the Production of Ti6Al4V-TiC Metal–Matrix Composite Powder by High-Energy Ball Milling and Ti6Al4V Powder by Gas Atomization
Source: MDPI journal article supplement (doi:10.3390/su15086649), 2023-04-14
Supplement: s1 [file s1]

## **Supplementary information for:**

### **Comparative Life Cycle Assessment and Cost Analysis of the production of Ti6Al4V-TiC Metal-Matrix Composite powder by High-Energy Ball Milling and Ti6Al4V powder by Gas Atomization**

Mario Santiago-Herrera<sup>1</sup>, Jesús Ibáñez<sup>1</sup>, Marco De Pamphilis<sup>3</sup>, J.M. Alegre<sup>2</sup>, Juan Antonio Tamayo-Ramos<sup>1</sup>, Sonia Martel-Martín<sup>1\*</sup>, Rocío Barros<sup>1\*</sup>

<sup>1</sup>International Research Center in Critical Raw Materials for Advanced Industrial Technologies (ICCRAM). University of Burgos, Centro de I+D+I. Plaza Misael Bañuelos s/n. 09001 Burgos, Spain.

<sup>2</sup>Structural Integrity Research Group, Universidad de Burgos. Avenida Cantabria s/n. 09006 Burgos, Spain.

<sup>3</sup>MBN nanomaterialia S.p.A. Via Giacomo Bortolan 42. 31050 Vascon di Carbonera, Italy.

\*Author for correspondence: rbarros@ubu.es; smartel@ubu.es

Table S 1. Average values and database sets for Ti-6Al-4V alloy.

| Saboori et. al 2018<br>doi.org/10.3791/56966 | Baccar et. al 2013<br>doi.org/10.1007/978-1-4614-4226-4_23 | Dong et. al 2021<br>doi.org/10.1016/j.addma.2020.101699 | Ti-6Al-4V average |            |                                                   |
|----------------------------------------------|------------------------------------------------------------|---------------------------------------------------------|-------------------|------------|---------------------------------------------------|
|                                              |                                                            |                                                         | Element           | Percentage | ecoinvent database v3.8                           |
| 5,830                                        | 6                                                          | 6                                                       | Al                | 5,9433     | Aluminium, cast alloy {GLO}  market for   APOS, U |
| 0,080                                        | 0,3                                                        | 0,07                                                    | Fe                | 0,1500     | Cast iron {GLO}  market for   APOS, U             |
| 0,017                                        | 0,08                                                       | 0,053                                                   | C                 | 0,0500     | Carbon black {GLO}  market for   APOS, U          |
| 3,890                                        | 4                                                          | 4                                                       | V                 | 3,9633     | Not found in ecoinvent databases                  |
| 90,124                                       | 89,36                                                      | 92                                                      | Ti                | 93,6512    | Titanium, primary {GLO}  market for   APOS, U     |
| 0,001                                        | 0                                                          | 0                                                       | S                 | 0,0005     | Sulfur {GLO}  market for   APOS, U                |
| 0,013                                        | 0,01                                                       | 0                                                       | H                 | 0,0077     | Hydrogen, liquid {RER}  market for   APOS, U      |
| 0,022                                        | 0,05                                                       | 0,009                                                   | N                 | 0,0270     | Nitrogen, liquid {GLO}  market for   APOS, U      |
| 0,023                                        | 0,2                                                        | 0,288                                                   | O                 | 0,1703     | Oxygen, liquid {GLO}  market for   APOS, U        |

Table S 2. Database sets for the inputs involved in the HEBM (High Energy Ball Milling) and GA (Gas Atomization) processes.

| Products                                    | Alloy quantity (kg/kg material produced)              | NPs quantity (kg/kg material produced)                                                                   | Energy consumption (kWh/kg material produced)                                        | Argon used (l/kg)                                       |
|---------------------------------------------|-------------------------------------------------------|----------------------------------------------------------------------------------------------------------|--------------------------------------------------------------------------------------|---------------------------------------------------------|
| <b>Ti-6Al-4V – 3,8 wt% TiC</b>              | 1,13                                                  | 0,038                                                                                                    | 4,5                                                                                  | 0,4                                                     |
| <b>Reference (ecoinvent databases v3.8)</b> | Titanium alloy, Ti-6Al-4V {GLO}  market for   APOS, U | Titanium carbide, TiC {GLO}  market for (based on SiC and B4C production and SiC market for)   APOS, U * | Electricity, medium voltage {Europe without Switzerland}  market group for   APOS, U | Argon, liquid {RER}  market for argon, liquid   APOS, U |
| <b>Ti6Al4V powder</b>                       | 1,3                                                   | 0                                                                                                        | 55                                                                                   | 10.000                                                  |
| <b>Reference (ecoinvent databases v3.8)</b> | Titanium alloy, Ti-6Al-4V {GLO}  market for   APOS, U | -                                                                                                        | Electricity, medium voltage {Europe without Switzerland}  market group for   APOS, U | Argon, liquid {RER}  market for argon, liquid   APOS, U |

\* TiO<sub>2</sub> (Titanium dioxide {RER}| market for | APOS, U) replaces SiO<sub>2</sub> (Silica sand {GLO}| market for | APOS, U), and Chemical factory, organics {GLO}| market for | APOS, U replaces Silicone factory {RER}| construction | APOS, U.

Table S 3. Characterization factors for the HEBM (High Energy Ball Milling) process.

| Impact category                   | Unit                   | Total   | Ti-6Al-4V | TiC     | Argon   | Electricity |
|-----------------------------------|------------------------|---------|-----------|---------|---------|-------------|
| Climate change                    | kg CO <sub>2</sub> eq  | 5,7E+01 | 5,4E+01   | 5,5E-01 | 7,7E-01 | 1,8E+00     |
| Ozone depletion                   | kg CFC11 eq            | 7,0E-06 | 6,8E-06   | 7,4E-08 | 4,9E-08 | 1,1E-07     |
| Ionising radiation                | kBq U-235 eq           | 5,5E+00 | 3,9E+00   | 1,2E-01 | 4,5E-01 | 1,0E+00     |
| Photochemical ozone formation     | kg NMVOC eq            | 2,2E-01 | 2,1E-01   | 2,0E-03 | 1,8E-03 | 4,0E-03     |
| Particulate matter                | disease inc.           | 4,6E-06 | 4,5E-06   | 3,8E-08 | 1,4E-08 | 3,1E-08     |
| Human toxicity, non-cancer        | CTUh                   | 8,8E-07 | 8,4E-07   | 1,2E-08 | 7,5E-09 | 1,7E-08     |
| Human toxicity, cancer            | CTUh                   | 1,1E-07 | 1,1E-07   | 1,2E-09 | 2,4E-10 | 5,3E-10     |
| Acidification                     | mol H <sup>+</sup> eq  | 3,5E-01 | 3,3E-01   | 9,0E-03 | 4,2E-03 | 9,7E-03     |
| Eutrophication, freshwater        | kg P eq                | 3,1E-02 | 2,8E-02   | 2,5E-04 | 7,8E-04 | 1,8E-03     |
| Eutrophication, marine            | kg N eq                | 5,9E-02 | 5,6E-02   | 5,9E-04 | 7,4E-04 | 1,7E-03     |
| Eutrophication, terrestrial       | mol N eq               | 6,0E-01 | 5,8E-01   | 5,3E-03 | 6,4E-03 | 1,5E-02     |
| Ecotoxicity, freshwater           | CTUe                   | 1,5E+03 | 1,4E+03   | 1,3E+01 | 1,1E+01 | 2,5E+01     |
| Land use                          | Pt                     | 2,7E+02 | 2,5E+02   | 3,8E+00 | 2,9E+00 | 6,7E+00     |
| Water use                         | m <sup>3</sup> depriv. | 1,8E+01 | 1,5E+01   | 5,2E-01 | 1,5E+00 | 5,6E-01     |
| Resource use, fossils             | MJ                     | 6,7E+02 | 6,1E+02   | 8,6E+00 | 1,7E+01 | 3,8E+01     |
| Resource use, minerals and metals | kg Sb eq               | 2,5E-04 | 2,4E-04   | 2,9E-06 | 2,2E-06 | 4,6E-06     |

Table S 4. Characterization factors for the GA (Gas Atomization) process.

| Impact category                   | Unit                   | Total   | Ti-6Al-4V | Argon   | Electricity |
|-----------------------------------|------------------------|---------|-----------|---------|-------------|
| Climate change                    | kg CO <sub>2</sub> eq  | 4,7E+02 | 6,2E+01   | 3,8E+02 | 2,2E+01     |
| Ozone depletion                   | kg CFC11 eq            | 3,4E-05 | 7,8E-06   | 2,5E-05 | 1,4E-06     |
| Ionising radiation                | kBq U-235 eq           | 2,4E+02 | 4,5E+00   | 2,2E+02 | 1,3E+01     |
| Photochemical ozone formation     | kg NMVOC eq            | 1,2E+00 | 2,4E-01   | 8,8E-01 | 4,9E-02     |
| Particulate matter                | disease inc.           | 1,2E-05 | 5,2E-06   | 6,8E-06 | 3,8E-07     |
| Human toxicity, non-cancer        | CTUh                   | 4,9E-06 | 9,7E-07   | 3,8E-06 | 2,1E-07     |
| Human toxicity, cancer            | CTUh                   | 2,5E-07 | 1,3E-07   | 1,2E-07 | 6,5E-09     |
| Acidification                     | mol H <sup>+</sup> eq  | 2,6E+00 | 3,8E-01   | 2,1E+00 | 1,2E-01     |
| Eutrophication, freshwater        | kg P eq                | 4,4E-01 | 3,2E-02   | 3,9E-01 | 2,2E-02     |
| Eutrophication, marine            | kg N eq                | 4,6E-01 | 6,4E-02   | 3,7E-01 | 2,1E-02     |
| Eutrophication, terrestrial       | mol N eq               | 4,0E+00 | 6,6E-01   | 3,2E+00 | 1,8E-01     |
| Ecotoxicity, freshwater           | CTUe                   | 7,4E+03 | 1,6E+03   | 5,4E+03 | 3,0E+02     |
| Land use                          | Pt                     | 1,8E+03 | 2,9E+02   | 1,5E+03 | 8,1E+01     |
| Water use                         | m <sup>3</sup> depriv. | 7,6E+02 | 1,7E+01   | 7,4E+02 | 6,9E+00     |
| Resource use, fossils             | MJ                     | 9,5E+03 | 7,0E+02   | 8,3E+03 | 4,6E+02     |
| Resource use, minerals and metals | kg Sb eq               | 1,4E-03 | 2,8E-04   | 1,1E-03 | 5,6E-05     |

Table S 5. Normalization factors for HEBM (High Energy Ball Milling) process.

| Impact category                   | Unit | Total     | Ti-6Al-4V | TiC       | Argon     | Electricity |
|-----------------------------------|------|-----------|-----------|-----------|-----------|-------------|
| Climate change                    | -    | 7,055E-03 | 6,674E-03 | 6,847E-05 | 9,494E-05 | 2,182E-04   |
| Ozone depletion                   | -    | 1,303E-04 | 1,259E-04 | 1,388E-06 | 9,138E-07 | 2,060E-06   |
| Ionising radiation                | -    | 1,306E-03 | 9,276E-04 | 2,835E-05 | 1,065E-04 | 2,433E-04   |
| Photochemical ozone formation     | -    | 5,420E-03 | 5,230E-03 | 4,872E-05 | 4,317E-05 | 9,867E-05   |
| Particulate matter                | -    | 7,777E-03 | 7,638E-03 | 6,449E-05 | 2,299E-05 | 5,167E-05   |
| Human toxicity, non-cancer        | -    | 3,830E-03 | 3,670E-03 | 5,253E-05 | 3,270E-05 | 7,439E-05   |
| Human toxicity, cancer            | -    | 6,686E-03 | 6,567E-03 | 7,364E-05 | 1,410E-05 | 3,147E-05   |
| Acidification                     | -    | 6,388E-03 | 5,977E-03 | 1,616E-04 | 7,554E-05 | 1,740E-04   |
| Eutrophication, freshwater        | -    | 1,921E-02 | 1,745E-02 | 1,563E-04 | 4,848E-04 | 1,123E-03   |
| Eutrophication, marine            | -    | 3,013E-03 | 2,857E-03 | 3,006E-05 | 3,810E-05 | 8,749E-05   |
| Eutrophication, terrestrial       | -    | 3,418E-03 | 3,269E-03 | 3,018E-05 | 3,624E-05 | 8,308E-05   |
| Ecotoxicity, freshwater           | -    | 3,470E-02 | 3,355E-02 | 3,102E-04 | 2,547E-04 | 5,804E-04   |
| Land use                          | -    | 3,263E-04 | 3,100E-04 | 4,596E-06 | 3,563E-06 | 8,129E-06   |
| Water use                         | -    | 1,533E-03 | 1,310E-03 | 4,517E-05 | 1,287E-04 | 4,898E-05   |
| Resource use, fossils             | -    | 1,036E-02 | 9,393E-03 | 1,322E-04 | 2,559E-04 | 5,838E-04   |
| Resource use, minerals and metals | -    | 3,937E-03 | 3,785E-03 | 4,532E-05 | 3,413E-05 | 7,251E-05   |

Table S 6. Normalization factors for GA (Gas Atomization) process.

| Impact category                   | Unit | Total    | Ti-6Al-4V | Argon    | Electricity |
|-----------------------------------|------|----------|-----------|----------|-------------|
| Climate change                    | -    | 5,78E-02 | 7,68E-03  | 4,75E-02 | 2,67E-03    |
| Ozone depletion                   | -    | 6,27E-04 | 1,45E-04  | 4,57E-04 | 2,52E-05    |
| Ionising radiation                | -    | 5,73E-02 | 1,07E-03  | 5,32E-02 | 2,97E-03    |
| Photochemical ozone formation     | -    | 2,88E-02 | 6,02E-03  | 2,16E-02 | 1,21E-03    |
| Particulate matter                | -    | 2,09E-02 | 8,79E-03  | 1,15E-02 | 6,31E-04    |
| Human toxicity, non-cancer        | -    | 2,15E-02 | 4,22E-03  | 1,63E-02 | 9,09E-04    |
| Human toxicity, cancer            | -    | 1,50E-02 | 7,56E-03  | 7,05E-03 | 3,85E-04    |
| Acidification                     | -    | 4,68E-02 | 6,88E-03  | 3,78E-02 | 2,13E-03    |
| Eutrophication, freshwater        | -    | 2,76E-01 | 2,01E-02  | 2,42E-01 | 1,37E-02    |
| Eutrophication, marine            | -    | 2,34E-02 | 3,29E-03  | 1,90E-02 | 1,07E-03    |
| Eutrophication, terrestrial       | -    | 2,29E-02 | 3,76E-03  | 1,81E-02 | 1,02E-03    |
| Ecotoxicity, freshwater           | -    | 1,73E-01 | 3,86E-02  | 1,27E-01 | 7,09E-03    |
| Land use                          | -    | 2,24E-03 | 3,57E-04  | 1,78E-03 | 9,94E-05    |
| Water use                         | -    | 6,65E-02 | 1,51E-03  | 6,44E-02 | 5,99E-04    |
| Resource use, fossils             | -    | 1,46E-01 | 1,08E-02  | 1,28E-01 | 7,13E-03    |
| Resource use, minerals and metals | -    | 2,23E-02 | 4,35E-03  | 1,71E-02 | 8,86E-04    |

Table S 7. Weighting factors for HEBM (High Energy Ball Milling) process.

| Impact category                   | Unit       | Total          | Ti-6Al-4V      | TiC            | Argon          | Electricity    |
|-----------------------------------|------------|----------------|----------------|----------------|----------------|----------------|
| <b>Total</b>                      | <b>mPt</b> | <b>5,9E+00</b> | <b>5,5E+00</b> | <b>6,8E-02</b> | <b>9,1E-02</b> | <b>1,9E-01</b> |
| Climate change                    | mPt        | 1,5E+00        | 1,4E+00        | 1,4E-02        | 2,0E-02        | 4,6E-02        |
| Ozone depletion                   | mPt        | 8,2E-03        | 7,9E-03        | 8,8E-05        | 5,8E-05        | 1,3E-04        |
| Ionising radiation                | mPt        | 6,5E-02        | 4,6E-02        | 1,4E-03        | 5,3E-03        | 1,2E-02        |
| Photochemical ozone formation     | mPt        | 2,6E-01        | 2,5E-01        | 2,3E-03        | 2,1E-03        | 4,7E-03        |
| Particulate matter                | mPt        | 7,0E-01        | 6,8E-01        | 5,8E-03        | 2,1E-03        | 4,6E-03        |
| Human toxicity, non-cancer        | mPt        | 7,0E-02        | 6,8E-02        | 9,7E-04        | 6,0E-04        | 1,4E-03        |
| Human toxicity, cancer            | mPt        | 1,4E-01        | 1,4E-01        | 1,6E-03        | 3,0E-04        | 6,7E-04        |
| Acidification                     | mPt        | 4,0E-01        | 3,7E-01        | 1,0E-02        | 4,7E-03        | 1,1E-02        |
| Eutrophication, freshwater        | mPt        | 5,4E-01        | 4,9E-01        | 4,4E-03        | 1,4E-02        | 3,1E-02        |
| Eutrophication, marine            | mPt        | 8,9E-02        | 8,5E-02        | 8,9E-04        | 1,1E-03        | 2,6E-03        |
| Eutrophication, terrestrial       | mPt        | 1,3E-01        | 1,2E-01        | 1,1E-03        | 1,3E-03        | 3,1E-03        |
| Ecotoxicity, freshwater           | mPt        | 6,7E-01        | 6,4E-01        | 6,0E-03        | 4,9E-03        | 1,1E-02        |
| Land use                          | mPt        | 2,6E-02        | 2,5E-02        | 3,6E-04        | 2,8E-04        | 6,5E-04        |
| Water use                         | mPt        | 1,3E-01        | 1,1E-01        | 3,8E-03        | 1,1E-02        | 4,2E-03        |
| Resource use, fossils             | mPt        | 8,6E-01        | 7,8E-01        | 1,1E-02        | 2,1E-02        | 4,9E-02        |
| Resource use, minerals and metals | mPt        | 3,0E-01        | 2,9E-01        | 3,4E-03        | 2,6E-03        | 5,5E-03        |
| Impact category                   | Unit       | Total          | Ti-6Al-4V      | TiC            | Argon          | Electricity    |
| <b>Total</b>                      | <b>%</b>   | <b>100</b>     | <b>94,09</b>   | <b>1,15</b>    | <b>1,56</b>    | <b>3,20</b>    |
| Climate change                    | %          | 100            | 94,59          | 0,97           | 1,35           | 3,09           |
| Ozone depletion                   | %          | 100            | 96,65          | 1,07           | 0,70           | 1,58           |
| Ionising radiation                | %          | 100            | 71,04          | 2,17           | 8,16           | 18,63          |
| Photochemical ozone formation     | %          | 100            | 96,48          | 0,90           | 0,80           | 1,82           |
| Particulate matter                | %          | 100            | 98,21          | 0,83           | 0,30           | 0,66           |
| Human toxicity, non-cancer        | %          | 100            | 95,83          | 1,37           | 0,85           | 1,94           |
| Human toxicity, cancer            | %          | 100            | 98,22          | 1,10           | 0,21           | 0,47           |
| Acidification                     | %          | 100            | 93,56          | 2,53           | 1,18           | 2,72           |
| Eutrophication, freshwater        | %          | 100            | 90,82          | 0,81           | 2,52           | 5,85           |
| Eutrophication, marine            | %          | 100            | 94,83          | 1,00           | 1,26           | 2,90           |
| Eutrophication, terrestrial       | %          | 100            | 95,63          | 0,88           | 1,06           | 2,43           |
| Ecotoxicity, freshwater           | %          | 100            | 96,70          | 0,89           | 0,73           | 1,67           |
| Land use                          | %          | 100            | 95,01          | 1,41           | 1,09           | 2,49           |
| Water use                         | %          | 100            | 85,46          | 2,95           | 8,40           | 3,19           |
| Resource use, fossils             | %          | 100            | 90,62          | 1,28           | 2,47           | 5,63           |
| Resource use, minerals and metals | %          | 100            | 96,14          | 1,15           | 0,87           | 1,84           |

Table S 8. Weighting factors for GA (Gas Atomization) process.

| Impact category                   | Unit       | Total           | Ti-6Al-4V       | Argon           | Electricity     |
|-----------------------------------|------------|-----------------|-----------------|-----------------|-----------------|
| <b>Total</b>                      | <b>mPt</b> | <b>5,42E+01</b> | <b>6,34E+00</b> | <b>4,56E+01</b> | <b>2,29E+00</b> |
| Climate change                    | mPt        | 1,22E+01        | 1,62E+00        | 1,00E+01        | 5,62E-01        |
| Ozone depletion                   | mPt        | 3,96E-02        | 9,14E-03        | 2,88E-02        | 1,59E-03        |
| Ionising radiation                | mPt        | 2,87E+00        | 5,35E-02        | 2,67E+00        | 1,49E-01        |
| Photochemical ozone formation     | mPt        | 1,38E+00        | 2,88E-01        | 1,03E+00        | 5,76E-02        |
| Particulate matter                | mPt        | 1,87E+00        | 7,87E-01        | 1,03E+00        | 5,66E-02        |
| Human toxicity, non-cancer        | mPt        | 3,95E-01        | 7,77E-02        | 3,01E-01        | 1,67E-02        |
| Human toxicity, cancer            | mPt        | 3,19E-01        | 1,61E-01        | 1,50E-01        | 8,19E-03        |
| Acidification                     | mPt        | 2,90E+00        | 4,26E-01        | 2,34E+00        | 1,32E-01        |
| Eutrophication, freshwater        | mPt        | 7,73E+00        | 5,62E-01        | 6,79E+00        | 3,84E-01        |
| Eutrophication, marine            | mPt        | 6,93E-01        | 9,73E-02        | 5,64E-01        | 3,17E-02        |
| Eutrophication, terrestrial       | mPt        | 8,49E-01        | 1,40E-01        | 6,72E-01        | 3,77E-02        |
| Ecotoxicity, freshwater           | mPt        | 3,32E+00        | 7,41E-01        | 2,45E+00        | 1,36E-01        |
| Land use                          | mPt        | 1,78E-01        | 2,83E-02        | 1,41E-01        | 7,89E-03        |
| Water use                         | mPt        | 5,66E+00        | 1,28E-01        | 5,48E+00        | 5,09E-02        |
| Resource use, fossils             | mPt        | 1,21E+01        | 8,99E-01        | 1,06E+01        | 5,94E-01        |
| Resource use, minerals and metals | mPt        | 1,68E+00        | 3,29E-01        | 1,29E+00        | 6,69E-02        |
| Impact category                   | Unit       | Total           | Ti-6Al-4V       | Argon           | Electricity     |
| <b>Total</b>                      | <b>%</b>   | <b>100</b>      | <b>11,70</b>    | <b>84,07</b>    | <b>4,23</b>     |
| Climate change                    | %          | 100             | 13,28           | 82,11           | 4,61            |
| Ozone depletion                   | %          | 100             | 23,10           | 72,88           | 4,02            |
| Ionising radiation                | %          | 100             | 1,86            | 92,95           | 5,19            |
| Photochemical ozone formation     | %          | 100             | 20,89           | 74,93           | 4,19            |
| Particulate matter                | %          | 100             | 42,02           | 54,97           | 3,02            |
| Human toxicity, non-cancer        | %          | 100             | 19,66           | 76,11           | 4,23            |
| Human toxicity, cancer            | %          | 100             | 50,40           | 47,04           | 2,57            |
| Acidification                     | %          | 100             | 14,70           | 80,75           | 4,55            |
| Eutrophication, freshwater        | %          | 100             | 7,27            | 87,76           | 4,97            |
| Eutrophication, marine            | %          | 100             | 14,04           | 81,39           | 4,57            |
| Eutrophication, terrestrial       | %          | 100             | 16,42           | 79,14           | 4,43            |
| Ecotoxicity, freshwater           | %          | 100             | 22,31           | 73,59           | 4,10            |
| Land use                          | %          | 100             | 15,94           | 79,62           | 4,44            |
| Water use                         | %          | 100             | 2,27            | 96,83           | 0,90            |
| Resource use, fossils             | %          | 100             | 7,41            | 87,70           | 4,89            |
| Resource use, minerals and metals | %          | 100             | 19,52           | 76,51           | 3,97            |
